# Supplementary material for: Polymorph transformation in a mixed-stacking nickel-dithiolene complex with the derivative of 4,4′-bipyridinium
Source: Royal Society of Chemistry journal article supplement (doi:10.1039/d4dt00324a), 2024-01-01
Supplement: d4dt00324a1.pdf [file d4dt00324a1.pdf]

## Polymorph transformation in a mixed-stacking nickel-dithiolene complex with the derivative of 4,4'-bipyridinium

Yan Gao,<sup>a</sup> Lei Xu,<sup>a</sup> Zi-Heng Feng,<sup>a</sup> Yin Qian,<sup>\*a</sup> Zheng-Fang Tian,<sup>b</sup> Xiao-Ming Ren<sup>\*a,c</sup>

<sup>a</sup>State Key Laboratory of Materials-Oriented Chemical Engineering and College of Chemistry and Molecular Engineering, Nanjing Tech University, Nanjing 211816, P. R. China

<sup>b</sup>Hubei Key Laboratory of Processing and Application of Catalytic materials, Huanggang Normal University, Huanggang, 438000, P. R. China

<sup>c</sup>State Key Laboratory of Coordination Chemistry, Nanjing University, Nanjing 210093, P. R. China

Email: [yinqian@njtech.edu.cn](mailto:yinqian@njtech.edu.cn) (Y.Q.); [xmren@njtech.edu.cn](mailto:xmren@njtech.edu.cn) (X.M.R.)

## Contents

### Experimental section

#### Materials

Synthesis of [C<sub>4</sub>-4, 4'-BiPy][Ni(mnt)<sub>2</sub>] (**1-g**)

#### Physical measurements

#### X-Ray single crystallography

**Table S1.** Crystal data and structure refinement parameters for **1-r**

**Table S2.** Enthalpy and entropy changes of phase transitions in **1-g** and **1-r**, together with the peak temperature of thermal anomalies

**Figure S1.** IR spectrum of **1-r** and **1-g** in 4000–500 cm<sup>-1</sup>.

**Figure S2.** Schematic illustration for the dihedral angles between the mean-molecular planes of anions as well as between the mean-molecular planes of bipyridyl rings in the neighboring mixed-stacking columns of **1-r**.

**Figure S3.** Top and side views of C<sub>4</sub>-4,4'-Bipy<sup>2+</sup> cation in the crystal structure of **1-r** at 296 K (in the high-temperature phase), where the butyl chains show all-trans conformation.

**Figure S4.** Top and side views of two crystallographically different C<sub>4</sub>-4,4'-Bipy<sup>2+</sup> cations in the crystal structure of **1-r** at 100 K (in the low-temperature phase), where the butyl chains show all-trans conformation.

**Figure S5.** Experimental PXRD patterns of **1-g**, **1-r** and **1-r** ground together with the simulated PXRD pattern of **1-r**.

**Figure S6.** Variable-temperature UV-visible-near IR spectra of (a) **1-g** and (b) **1-r**.

**Figure S7.** Variable-temperature images of **1-g**, displaying the sequence of temperature changes following the direction of the arrow.

**Figure S8.** Variable-temperature images of **1-r**, displaying the sequence of temperature changes following the direction of the arrow.

**Figure S9.** PXRD patterns of **1-g**, **1-r** annealed at 473 and 523 K and the measurement performed at room temperature.

### References

## Experimental section

### Materials

All reagents and chemicals were purchased from commercial sources and used directly. Disodium maleonitriledithiolate ( $\text{Na}_2\text{mnt}$ ),<sup>1</sup> 1,1'-dibutyl-4,4'-bipyridinium dibromide ( $[\text{C}_4\text{-4, 4'-BiPy}]\text{Br}_2$ )<sup>2</sup> were prepared following the published procedures.

### Synthesis of $[\text{C}_4\text{-4, 4'-BiPy}][\text{Ni}(\text{mnt})_2]$ (**1-g**)

$[\text{C}_4\text{-4,4'-Bipy}][\text{Ni}(\text{mnt})_2]$  (**1-g**):  $\text{Na}_2\text{mnt}$  (372 mg, 2 mmol) and  $\text{NiCl}_2 \cdot 6\text{H}_2\text{O}$  (237 mg, 1 mmol) were mixed under stirring with 100 mL  $\text{H}_2\text{O}$  at ambient temperature, subsequently, a solution of  $[\text{C}_4\text{-4, 4'-BiPy}]\text{Br}_2$  (430 mg, 1 mmol) with 30 mL  $\text{H}_2\text{O}$  was added to the mixture. The precipitate was immediately formed, and the mixed solution was vigorously stirred for 10 min. and then filtered off, washed with 15 mL of  $\text{H}_2\text{O}$  ( $3 \times 5$  mL). The crude product was collected by suction and dried in an oven at  $40^\circ\text{C}$  for 4h to give light green microcrystals, with yield of  $\sim 84\%$  (calc. based on  $\text{NiCl}_2 \cdot 6\text{H}_2\text{O}$ ). Anal. Calc. for  $\text{C}_{26}\text{H}_{26}\text{N}_6\text{S}_4\text{Ni}$  (**1-g**): C, 51.24; H, 4.30; N, 13.79%. Found: C, 51.13; H, 4.30; N, 13.94%. **1-g** underwent immersion in MeOH and was subjected to ultrasonic treatment for half hour, yielding a microcrystalline sample that appeared red in color (denoted as **1-r**), and microanalysis found: C, 51.21; H, 4.28; N, 14.08%.

The single crystals suitable for X-ray structure analysis were grown by diffusion method in a sealed test tube, i.e., the solution of **1-r** in 3 mL of DMF and 10 mL EtOH are placed on the bottom and top of a test tube, respectively. This tube was sealed at ambient temperature, and the plate-shaped crystals of **1-r** were obtained for  $\sim 10$  days.

### Physical measurements

Elemental analyses for C, H, and N were performed on an Elementar Vario EL III analytic instrument. IR spectra in  $4000\text{--}450\text{ cm}^{-1}$  were recorded on Bruker Tensor FTIR instrument that was equipped with an attenuated total reflection cell (Harrick) (ATR-FTIR). Powder X-ray diffraction (PXRD) data were collected on a MiniFlex600 X-ray diffractometer with  $\text{Cu K}_\alpha$  ( $\lambda = 1.5404 \text{ \AA}$ ) radiation at ambient temperature.

Thermogravimetric (TG) analyzer experiments were performed using a

simultaneous SDT 2960 thermal, the sample was held in a platinum pan under nitrogen flow in the rate of 100 mL min<sup>-1</sup> and heated at a ramping rate of 20 °C min<sup>-1</sup> from 303 to 1073 K (from 30 to 800 °C). Differential scanning calorimeter (DSC) experiments were carried out on Shimadzu DSC-60 differential scanning calorimeter in the temperature range of 186-523 K (from -87 to 250 °C).

Dielectric constant and loss measurements were carried out using Concept 80 system (Novo control, Germany) in the ranges of 1-10<sup>7</sup> Hz and 173-403 K; the powdered sample of **1-r** was pressed to a pellet with a thickness of ca. 1.216 mm and a diameter of 7.0 mm (an area of 38.5 mm<sup>2</sup>) under a static pressure of 8 MPa for 5 min., which two surfaces were gold-plated, such pellet was sandwiched by the copper electrodes for dielectric measurements, and the temperatures range from 173 to 473 K and the alternating current (AC) frequencies change from 1 to 10<sup>7</sup> Hz. Solid-state UV-vis-NIR absorption spectra were recorded on a Shimadzu UV3600PLUS equipped with Integrating Spheres.

### **X-Ray single crystallography**

Single-crystal X-ray diffraction data were collected on a Bruker D8 QUEST Apex III CCD area detector diffractometer with graphite-monochromated Mo K<sub>α</sub> radiation ( $\lambda = 0.71073 \text{ \AA}$ ) at room temperature. Data reduction and absorption correction were performed with the SAINT<sup>3</sup> and SADABS<sup>4</sup> software packages, respectively. The crystal structure was solved by direct method and refined on F<sup>2</sup> using full matrix least-squares method with SHELXTL package.<sup>5</sup> All hydrogen atoms were placed at the calculated positions and refined as riding on their parent atoms with fixed isotropic displacement parameters. X-ray diffraction data collection, structure refinement, and crystallography are summarized in Table S1.

**Table S1.** Crystal data and structure refinement parameters for **1-r**

|                                        |                                                                 |                                                                 |
|----------------------------------------|-----------------------------------------------------------------|-----------------------------------------------------------------|
| Chemical formula                       | C <sub>26</sub> H <sub>26</sub> N <sub>6</sub> NiS <sub>4</sub> | C <sub>26</sub> H <sub>26</sub> N <sub>6</sub> NiS <sub>4</sub> |
| CCDC number                            | 2311213                                                         | 2311215                                                         |
| Formula weight                         | 609.48                                                          | 609.48                                                          |
| Temperature (K)                        | 100                                                             | 296                                                             |
| Wavelength (Å)                         | 0.71073                                                         | 0.71073                                                         |
| Crystal system                         | triclinic                                                       | monoclinic                                                      |
| Space group                            | <i>P</i> -1                                                     | <i>P</i> 2/c                                                    |
| a (Å)                                  | 7.1650(7)                                                       | 8.864(2)                                                        |
| b (Å)                                  | 9.2160(8)                                                       | 8.089(2)                                                        |
| c (Å)                                  | 21.1039(18)                                                     | 20.473(5)                                                       |
| α (°)                                  | 94.597(3)                                                       | 90.00                                                           |
| β (°)                                  | 94.082(3)                                                       | 98.664(9)                                                       |
| γ (°)                                  | 93.219(3)                                                       | 90.00                                                           |
| V (Å <sup>3</sup> ) / Z                | 1382.9(2)                                                       | 1451.1(7)                                                       |
| D <sub>calc</sub> (g/cm <sup>3</sup> ) | 1.464                                                           | 1.395                                                           |
| Abs. coefficient (mm <sup>-1</sup> )   | 1.031                                                           | 0.983                                                           |
| F(000)                                 | 632                                                             | 632                                                             |
| θ range for data collection            | 2.221–26.405                                                    | 2.32–26.40                                                      |
| Index range                            | -8<h<8<br>-10<k<11<br>-26<l<26                                  | -11<h<11<br>-10<k<10<br>-25<l<24                                |
| Reflections collected                  | 15728                                                           | 12093                                                           |
| Independent reflections                | 5634                                                            | 2928                                                            |
| R <sub>int</sub>                       | 0.0615                                                          | 0.0852                                                          |
| Refinement on F <sup>2</sup>           | Full-matrix least-squares                                       | Full-matrix least-squares                                       |
| Data / restraints / parameters         | 5634 / 0 / 337                                                  | 2928 / 0 / 169                                                  |
| Goodness-of-fit on F <sup>2</sup>      | 1.034                                                           | 1.013                                                           |
| Final R indices [I > 2σ(I)]            | 0.0447                                                          | 0.0540                                                          |
| R indices (all data)                   | 0.0680                                                          | 0.1246                                                          |
| Residual (eÅ <sup>-3</sup> )           | 0.663/-0.682                                                    | 0.230/-0.249                                                    |

**Table S2.** Enthalpy and entropy changes of phase transitions in **1-g** and **1-r**, together with the peak temperature of thermal anomalies

| <b>1-g</b> |                      |                 |                 |                         |                 |                 |                                        |                 |                 |                                |                 |                 |
|------------|----------------------|-----------------|-----------------|-------------------------|-----------------|-----------------|----------------------------------------|-----------------|-----------------|--------------------------------|-----------------|-----------------|
| Mode       | T <sub>peak</sub> /K |                 |                 | ΔH/kJ mol <sup>-1</sup> |                 |                 | ΔS/J mol <sup>-1</sup> K <sup>-1</sup> |                 |                 | N <sub>2</sub> /N <sub>1</sub> |                 |                 |
| Heating    | 1 <sup>st</sup>      | 2 <sup>nd</sup> | 3 <sup>rd</sup> | 1 <sup>st</sup>         | 2 <sup>nd</sup> | 3 <sup>rd</sup> | 1 <sup>st</sup>                        | 2 <sup>nd</sup> | 3 <sup>rd</sup> | 1 <sup>st</sup>                | 2 <sup>nd</sup> | 3 <sup>rd</sup> |
|            | 399.0                | 400.7           | 400.1           | 8.3                     | 6.2             | 6.0             | 20.8                                   | 15.5            | 15.0            | 12.2                           | 6.5             | 6.1             |
| Cooling    | 1 <sup>st</sup>      | 2 <sup>nd</sup> | 3 <sup>rd</sup> | 1 <sup>st</sup>         | 2 <sup>nd</sup> | 3 <sup>rd</sup> | 1 <sup>st</sup>                        | 2 <sup>nd</sup> | 3 <sup>rd</sup> | 1 <sup>st</sup>                | 2 <sup>nd</sup> | 3 <sup>rd</sup> |
|            | 366.0                | 363.1           | 362.5           | 8.7                     | 7.7             | 7.2             | 23.8                                   | 21.2            | 19.8            | 17.5                           | 12.8            | 10.8            |
| <b>1-r</b> |                      |                 |                 |                         |                 |                 |                                        |                 |                 |                                |                 |                 |
| Heating    | 1 <sup>st</sup>      | 2 <sup>nd</sup> | 3 <sup>rd</sup> | 1 <sup>st</sup>         | 2 <sup>nd</sup> | 3 <sup>rd</sup> | 1 <sup>st</sup>                        | 2 <sup>nd</sup> | 3 <sup>rd</sup> | 1 <sup>st</sup>                | 2 <sup>nd</sup> | 3 <sup>rd</sup> |
|            | 274.2                | 402.1           | 402.5           | 1.05                    | 4.6             | 4.6             | 3.8                                    | 11.4            | 11.4            | 1.58                           | 3.9             | 3.9             |
| Heating    | 1 <sup>st</sup>      | 2 <sup>nd</sup> | 3 <sup>rd</sup> | 1 <sup>st</sup>         | 2 <sup>nd</sup> | 3 <sup>rd</sup> | 1 <sup>st</sup>                        | 2 <sup>nd</sup> | 3 <sup>rd</sup> | 1 <sup>st</sup>                | 2 <sup>nd</sup> | 3 <sup>rd</sup> |
|            | 494.8                | 480.2           | 479.1           | 16.6                    | 2.1             | 2.1             | 33.6                                   | 4.4             | 4.4             | 56.9                           | 1.7             | 1.7             |
| Cooling    | 1 <sup>st</sup>      | 2 <sup>nd</sup> | 3 <sup>rd</sup> | 1 <sup>st</sup>         | 2 <sup>nd</sup> | 3 <sup>rd</sup> | 1 <sup>st</sup>                        | 2 <sup>nd</sup> | 3 <sup>rd</sup> | 1 <sup>st</sup>                | 2 <sup>nd</sup> | 3 <sup>rd</sup> |
|            | 380.2                | 381.8           | 381.8           | 6.8                     | 7.2             | 7.2             | 18.0                                   | 18.8            | 18.8            | 8.7                            | 9.6             | 9.6             |

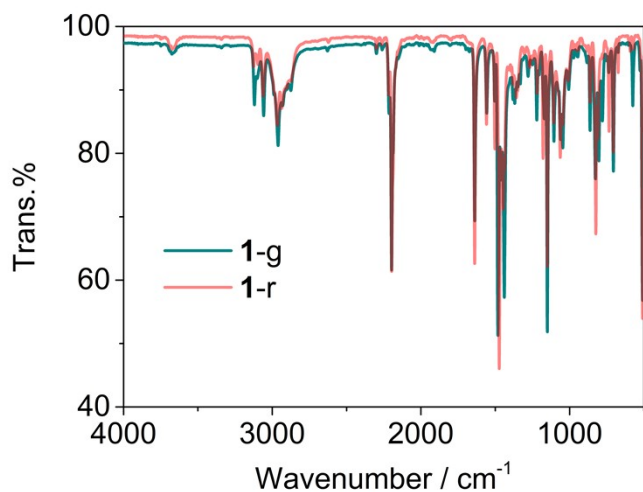

**Figure S1.** IR spectrum of **1-r** and **1-g** in 4000–500  $\text{cm}^{-1}$ .

The most intense vibrational band of  $\nu_{\text{C}\equiv\text{N}}$  (less than 2200  $\text{cm}^{-1}$ ) indicates that the valence of anion species is  $-2$ , band located at 735.7  $\text{cm}^{-1}$  is assigned to the number of alkyl chain length is less than three carbon atoms.

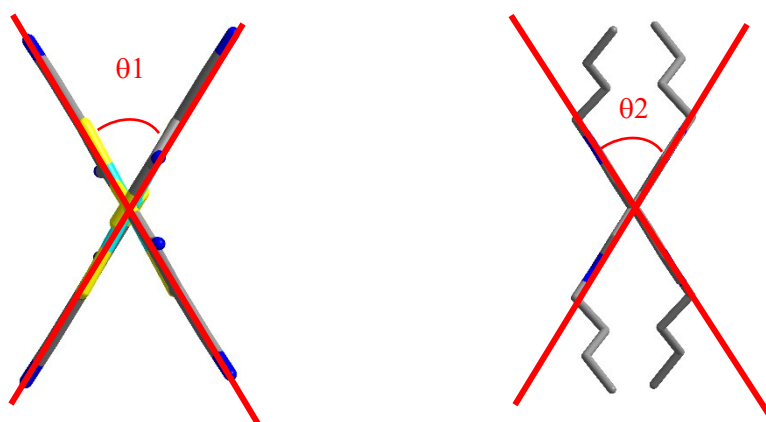

**Figure S2.** Schematic illustration for the dihedral angles between the mean-molecular planes of anions as well as between the mean-molecular planes of bipyridyl rings in the neighboring mixed-stacking columns of **1-r**.  $\theta_1 = 57.83^\circ$  at 296 K,  $61.19^\circ$  at 100 K;  $\theta_2 = 63.72^\circ$  at 296 K,  $72.74^\circ$  at 100 K.

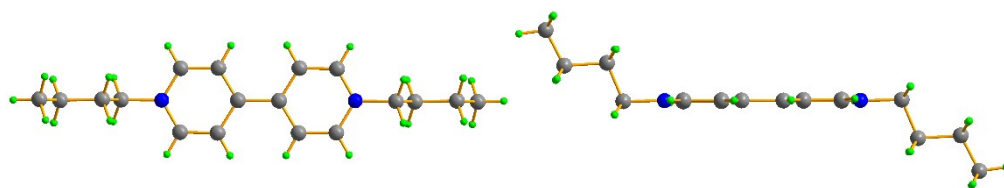

**Figure S3.** Top and side views of  $C_4-4',4'-Bipy^{2+}$  cation in the crystal structure of **1-r** at 296 K (in the high-temperature phase), where the butyl chains show all-trans conformation.

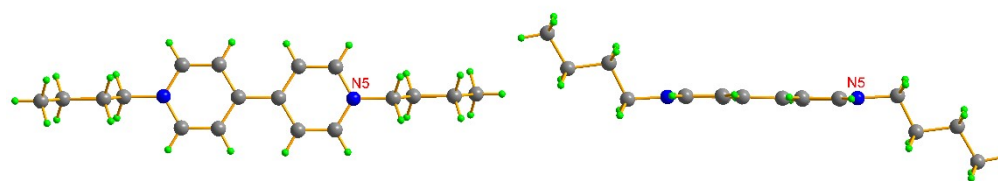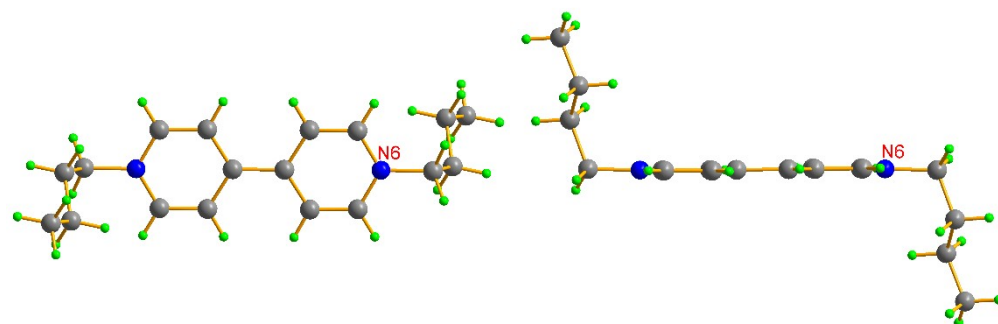

**Figure S4.** Top and side views of two crystallographically different  $C_4-4',4'-Bipy^{2+}$  cations in the crystal structure of **1-r** at 100 K (in the low-temperature phase), where the butyl chains show all-trans conformation.



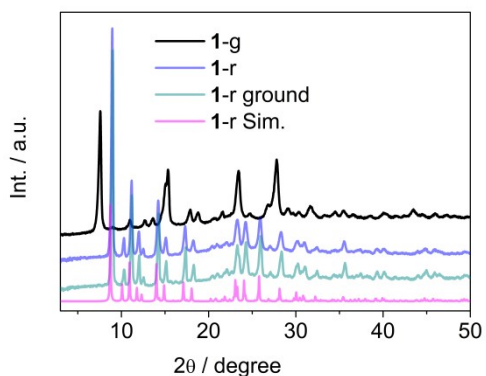

**Figure S5.** Experimental PXRD patterns of **1-g**, **1-r** and **1-r** ground together with the simulated PXRD pattern of **1-r**.

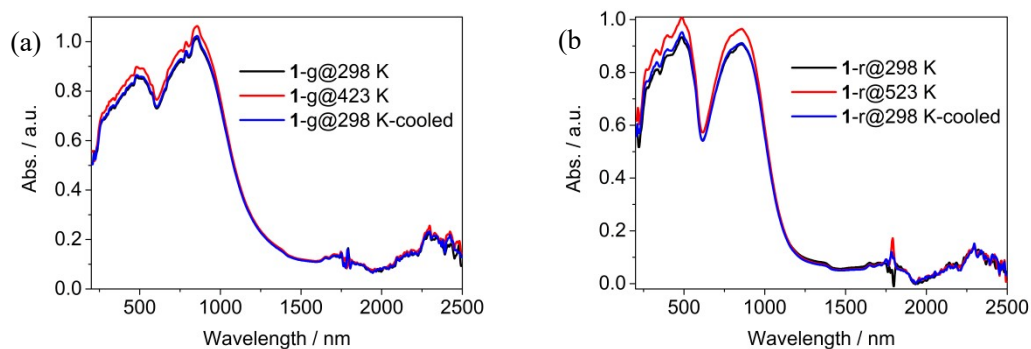

**Figure S6.** Variable-temperature UV-visible-near IR spectra of (a) **1-g** and (b) **1-r**.

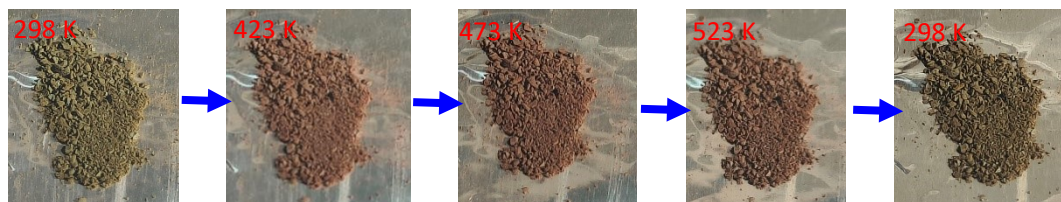

**Figure S7.** Variable-temperature images of **1-g**, displaying the sequence of temperature changes following the direction of the arrow. **1-g** is a poor conductor of heat, leading to non-uniform heating of its constituent particles. Consequently, certain particles in the sample back to 298 K attain higher temperatures than others, manifesting as a slight red hue in some powdered particles.

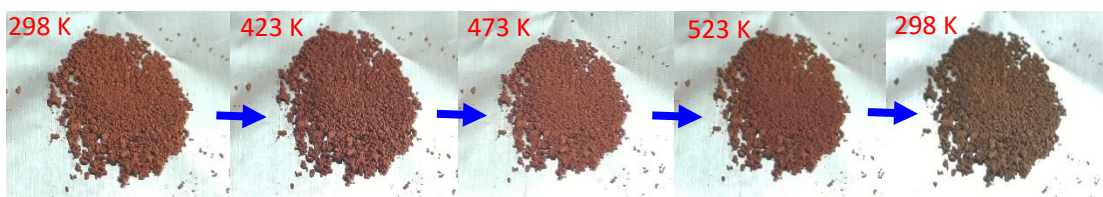

**Figure S8.** Variable-temperature images of **1-r**, displaying the sequence of temperature changes following the direction of the arrow. **1-r** is a poor conductor of heat, leading to non-uniform heating of its constituent particles. Consequently, certain particles in the sample back to 298 K attain higher temperatures than others, manifesting as a slight red hue in some powdered particles.

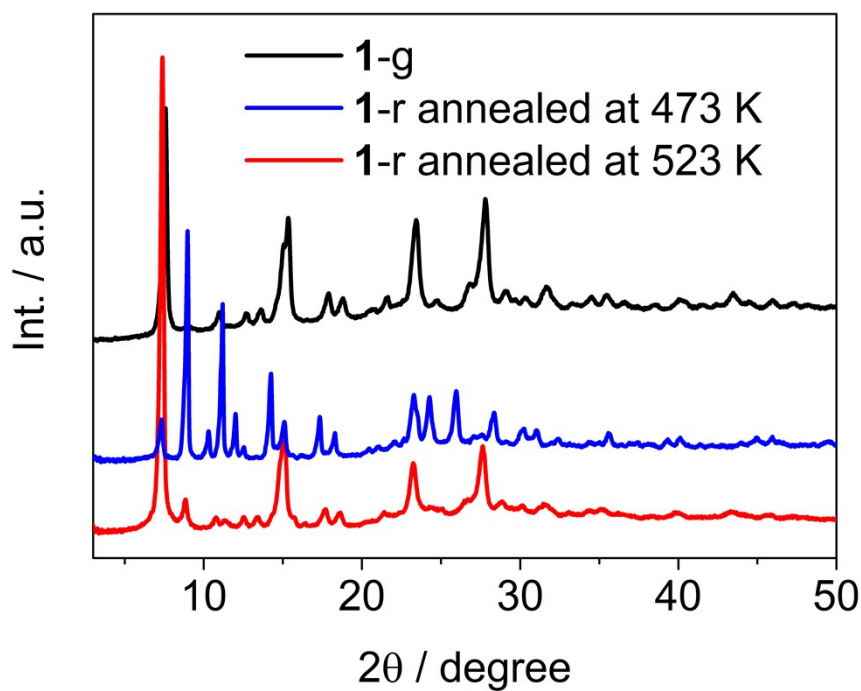

**Figure S9.** PXRD patterns of **1-g**, **1-r** annealed at 473 and 523 K and the measurement performed at room temperature.

## References

1. A. Davidson, H. R. Holm, Metal complexes derived from cis-1,2-dicyano-1,2-ethylenedithiolate and bis(trifluoromethyl)-1, 2-dithiete, *Inorg. Synth.*, 1967, **10**, 8–26.
2. H. B. Duan, X. M. Ren, L. J. Shen, W. Q. Jin, Q. J. Meng, Z. F. Tian, S. M. Zhou, A low-dimensional molecular spin system with two steps of magnetic transitions and liquid crystal property, *Dalton Trans.*, 2011, **40**, 3622–3630.
3. Bruker, APEX 2, SAINT, XPREP, Bruker AXS Inc., Madison, Wisconsin, USA, 2007.
4. Bruker, SADABS, Bruker AXS Inc., Madison, Wisconsin, USA, 2001.
5. Sheldrick, G. M. *SHELXS-2014*, Program for the Solution and Refinement of Crystal Structures, University of Göttingen, Göttingen, Germany, 2014.
